# Supplementary material
Source: PubMed Central journal article supplement (PMC3078816)

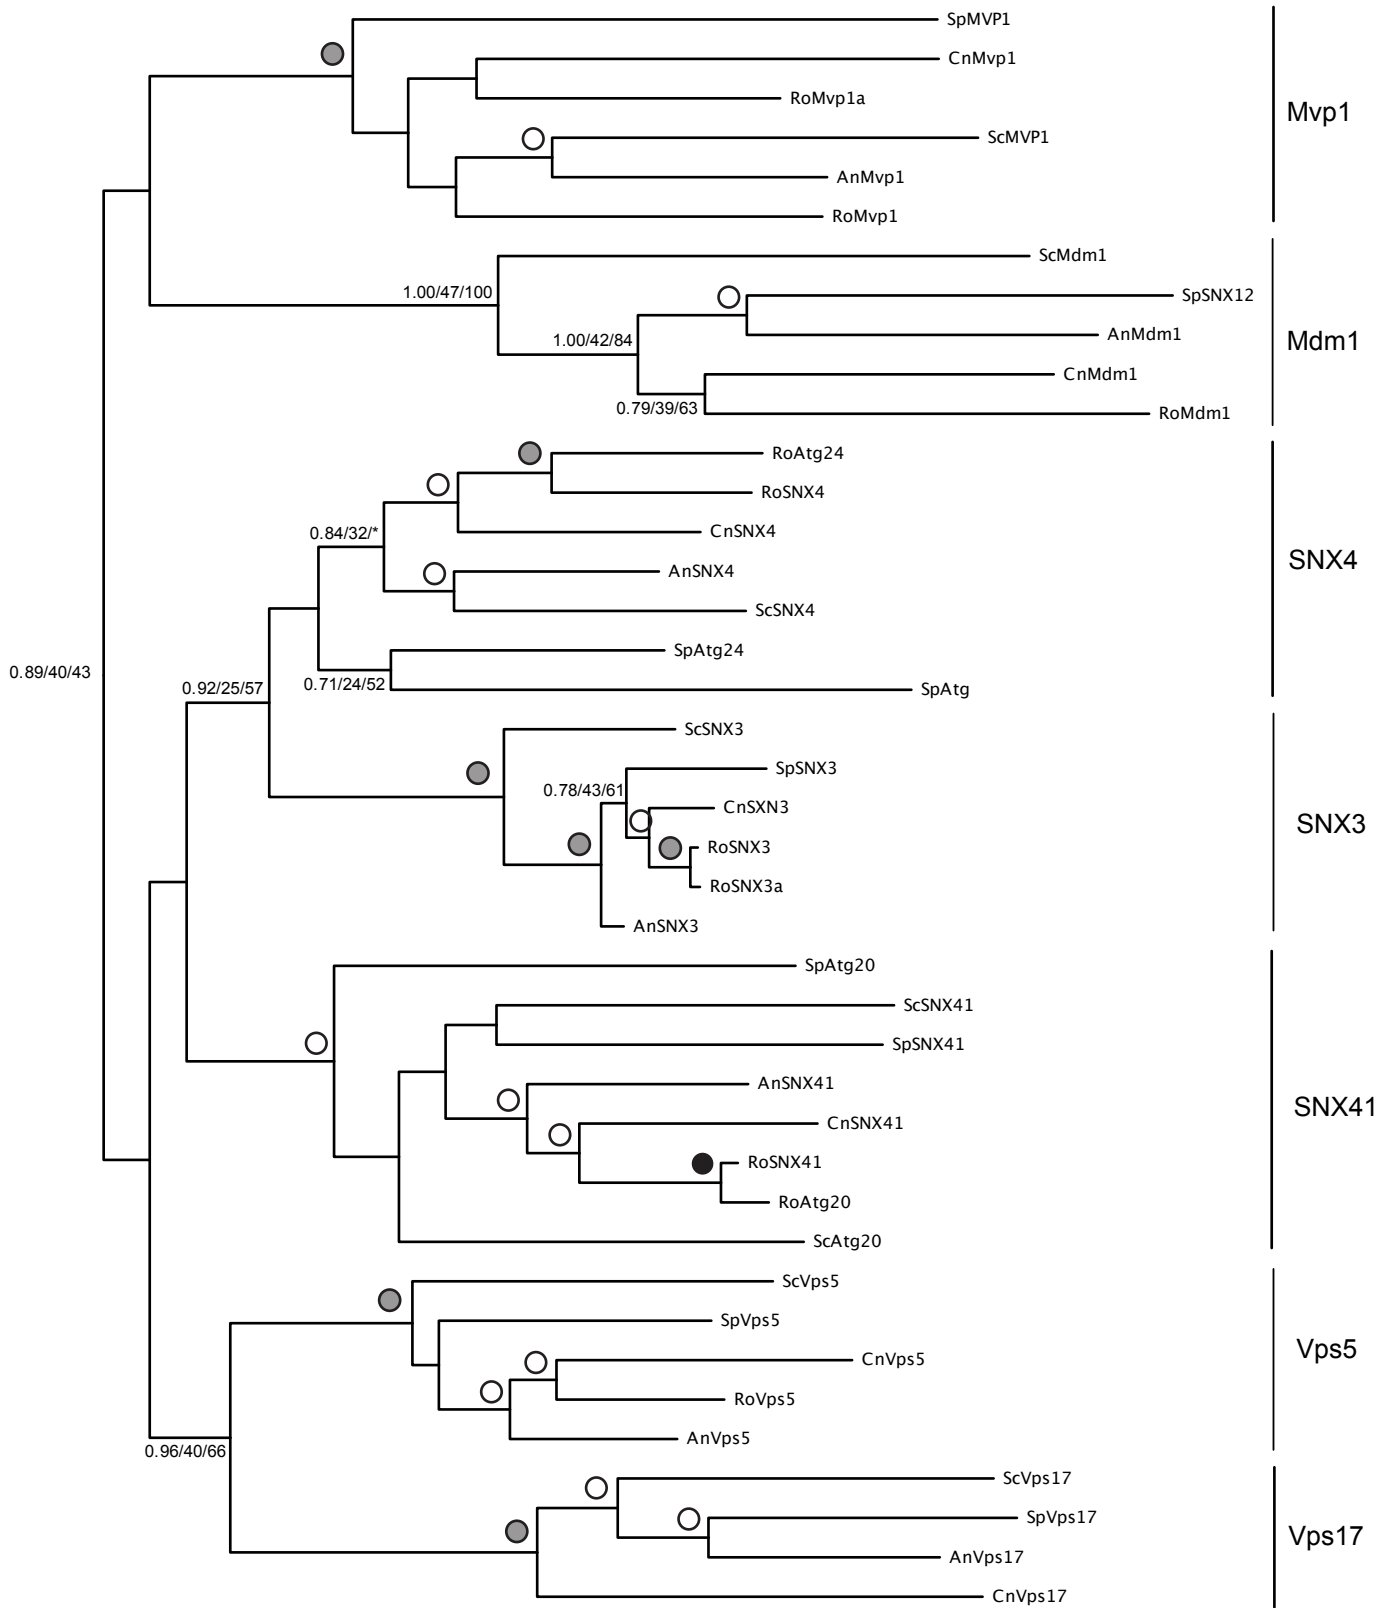

MrBayes/PhyML/RaxML  
 ● >0.99/99%/99%  
 ● >0.95/80%/80%  
 ○ >0.80/50%/50%

Supplement: supp_124_9_1496__1.pdf [file supp_124_9_1496__1.pdf]
